# Supplementary material for: Highly efficient alloyed NiCu/Nb2O5 catalyst for the hydrodeoxygenation of biofuel precursors into liquid alkanes
Source: Royal Society of Chemistry journal article supplement (doi:10.1039/d0cy00684j), 2020-01-01
Supplement: d0cy00684j1.pdf [file d0cy00684j1.pdf]

## Supporting Information

# Highly Efficient Alloyed NiCu/Nb<sub>2</sub>O<sub>5</sub> Catalyst for Hydrodeoxygenation of Biofuel Precursor into Liquid Alkanes

Peiyang Wang,<sup>§a</sup> Yaxuan Jing,<sup>§a</sup> Yong Guo,<sup>a</sup> Yan Cui,<sup>b</sup> Sheng Dai,<sup>b</sup> Xiaohui Liu<sup>a</sup> and Yanqin Wang<sup>\*a</sup>

## 1. Supplementary experimental materials

All chemicals were purchased from Adamas Reagent Co. Ltd, except for metal precursors Ni(NO<sub>3</sub>)<sub>2</sub>·6H<sub>2</sub>O, Co(NO<sub>3</sub>)<sub>2</sub>·6H<sub>2</sub>O, Fe(NO<sub>3</sub>)<sub>3</sub>·9H<sub>2</sub>O and Cu(NO<sub>3</sub>)<sub>2</sub>·3H<sub>2</sub>O, which were purchased from Sinopharm Chemical Reagent Co. Ltd.

The aldol adduct of furfural and acetone (FA) was prepared by aldol condensation of furfural with acetone in a 50 mL round-bottom flask. In a typical process, the reactions were carried out by adding 2 g of furfural, 20 g of 0.3M NaOH aqueous solution, 20 g methanol as solvent, and calculated amount of acetone (the molar ratio of furfural with acetone was 1:10) at room temperature. Under continuous stirring, the reactions were stopped not until the conversion of furfural > 99%. For the conversion of furfural (or HMF) analyses, an appropriate amount of the reaction mixture was sampled, followed by neutralizing with dilute hydrochloric acid and GC analysis for every 30 min. For aldol adducts separation, the aldol adducts were extracted from aqueous/methanol phase by 3 \* 20 ml of dichloromethane. After the extraction, the selectivity to FA was analyzed by GC equipped with flame ionization detector (FID). FA was direct obtained by removing dichloromethane with rotary evaporation at 40 °C without further purification.

The BTHF used for kinetic reaction was the product of hydrogenation of 2-n-butyl-furan, for each reaction, 0.6 g 2-n-butyl-furan was hydrogenated by 2%Pd/Al<sub>2</sub>O<sub>3</sub> under 160 °C, 3 MPa H<sub>2</sub> and 6.46 g cyclohexane as solvent for 12 h in sealed autoclave. After centrifugalization and evaporation, we obtained the BTHF determined by GC-MS system.

## 2. Supplementary results

**Table S1.** HDO of FA over various NiM/Nb<sub>2</sub>O<sub>5</sub> catalysts after 2 hours.

| Cat.                                      | Yield of octane /% | Yield of heptane /% | Octane/hep tane ratio O/H | Yield of (1+2+3) /% | Yield of 4 /% | Yield of 5 /% | Yield of DOE /% | CB. /% |
|-------------------------------------------|--------------------|---------------------|---------------------------|---------------------|---------------|---------------|-----------------|--------|
| 20%Ni/Nb <sub>2</sub> O <sub>5</sub>      | 19.3               | 9.2                 | 2.1                       | 8.3                 | 28.1          | 26.3          | 1.5             | 93.1   |
| 10%Ni10%Co/Nb <sub>2</sub> O <sub>5</sub> | 35.5               | 6.0                 | 5.9                       | 3.0                 | 8.1           | 24.2          | 9.3             | 90.2   |
| 10%Ni10%Fe/Nb <sub>2</sub> O <sub>5</sub> | 37.4               | 8.0                 | 4.7                       | 3.5                 | 5.6           | 33.5          | 2.4             | 90.3   |
| 10%Ni10%Cu/Nb <sub>2</sub> O <sub>5</sub> | 59.5               | 2.2                 | 27.0                      | 5.8                 | 0.3           | 16.8          | 5.4             | 91.2   |

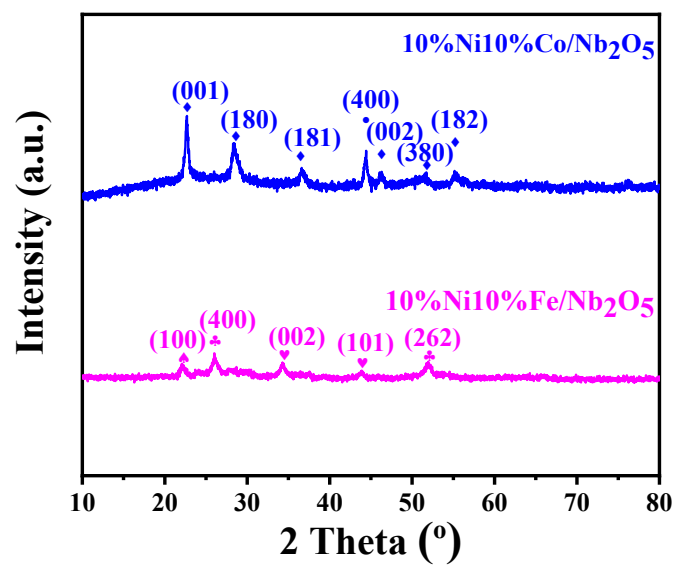

Figure S1. XRD patterns of various NiM/Nb<sub>2</sub>O<sub>5</sub> catalysts

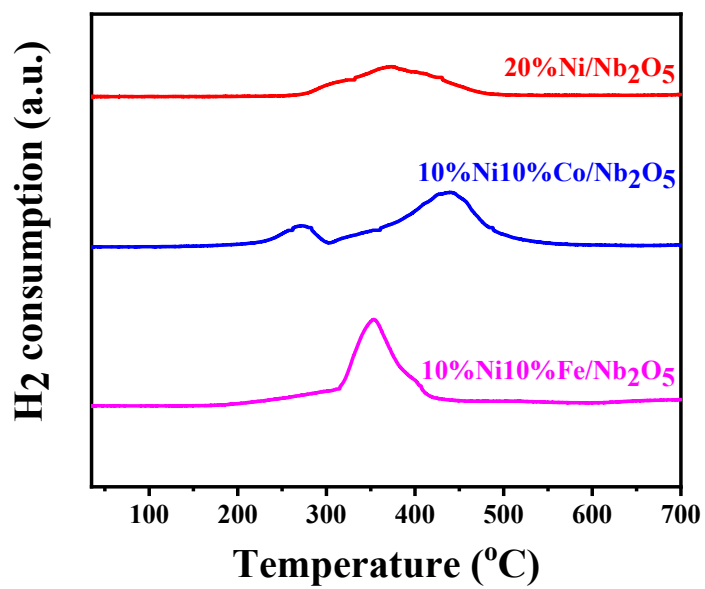

Figure S2. H<sub>2</sub>-TPR patterns of various NiM/Nb<sub>2</sub>O<sub>5</sub> catalysts.

**Table S2.** Summary of physicochemical properties of various NiM/Nb<sub>2</sub>O<sub>5</sub> catalysts.

| Cat.                                          | Surface area                     | Pore size | Pore volume                       |
|-----------------------------------------------|----------------------------------|-----------|-----------------------------------|
|                                               | /m <sup>2</sup> ·g <sup>-1</sup> | /nm       | /cm <sup>3</sup> ·g <sup>-1</sup> |
| 20%Ni/Nb <sub>2</sub> O <sub>5</sub>          | 106.8                            | 11.3      | 0.28                              |
| 10%Ni10%Cu/Nb <sub>2</sub> O <sub>5</sub>     | 71.1                             | 13.1      | 0.22                              |
| 10%Ni10%Co/Nb <sub>2</sub> O <sub>5</sub>     | 68.0                             | 13.1      | 0.20                              |
| 10%Ni10%Fe/Nb <sub>2</sub> O <sub>5</sub>     | 65.7                             | 12.8      | 0.21                              |
| 20%Cu/Nb <sub>2</sub> O <sub>5</sub>          | 15.6                             | 17.3      | 0.20                              |
| Nb <sub>2</sub> O <sub>5</sub> <sup>(a)</sup> | 67.3                             | 15.3      | 0.46                              |

<sup>(a)</sup>Reduced under 500 °C.

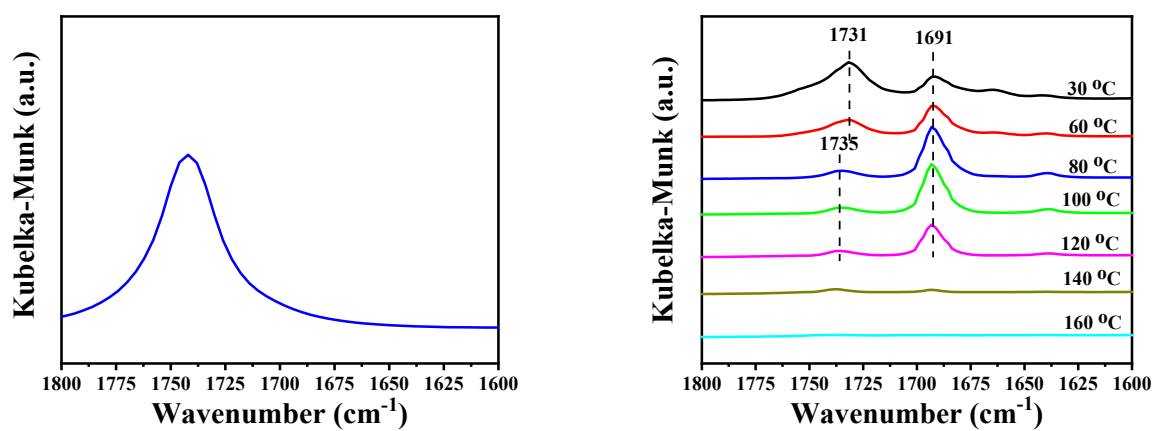

**Figure S3.** Standard FTIR spectra of octanal adspecies (<https://webbook.nist.gov/chemistry/>) and FTIR spectra of octanal adspecies at 30 °C and temperature programmed desorption of octanal over Nb<sub>2</sub>O<sub>5</sub>.

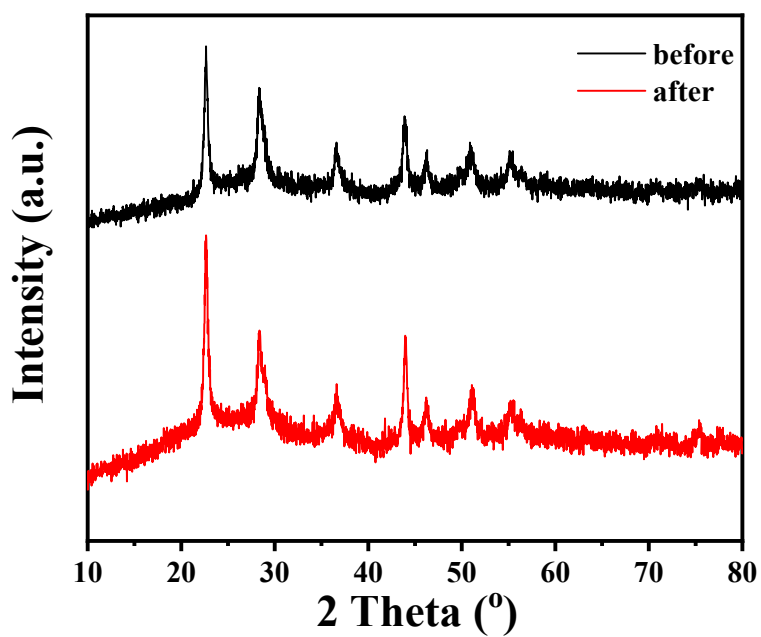

Figure S4. XRD patterns of fresh and used 10%Ni10%Cu/Nb<sub>2</sub>O<sub>5</sub> after 4 runs.

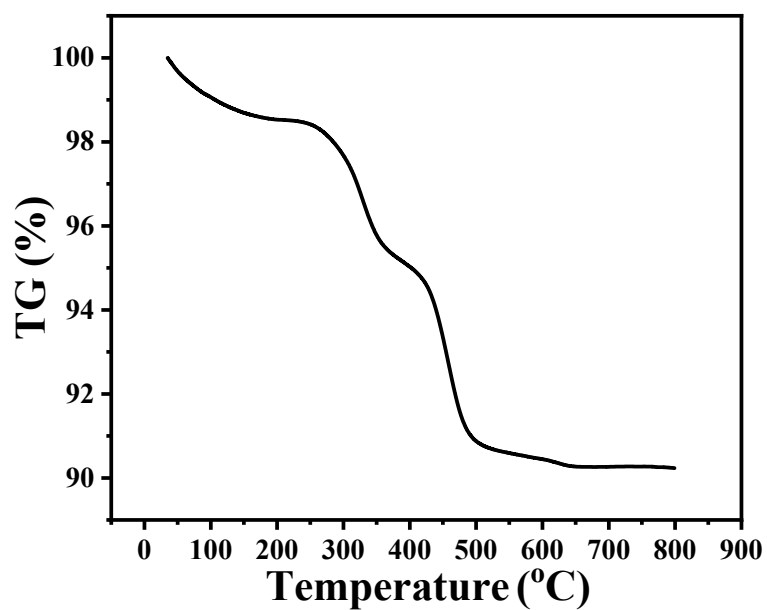

Figure S5. TG profile of spent 10%Ni10%Cu/Nb<sub>2</sub>O<sub>5</sub> after 4 runs.

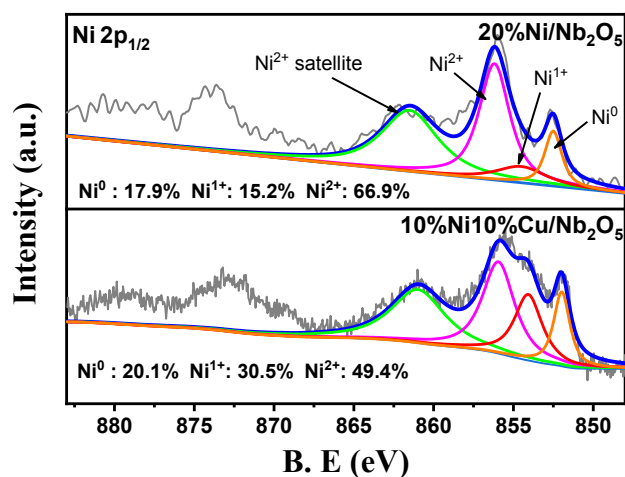

**Figure S6.** XPS spectra of (a) 20%Ni/Nb<sub>2</sub>O<sub>5</sub> and (b) 10%Ni10%Cu/Nb<sub>2</sub>O<sub>5</sub>.

We conducted the XPS analysis and the results show that the Ni/Cu surface composition ratio is 0.87/0.88. The positively charged Ni species on Ni/Nb<sub>2</sub>O<sub>5</sub> are dominated because of the electron-withdrawing effect of Nb<sub>2</sub>O<sub>5</sub>.<sup>1</sup> After introducing Cu, the NiCu/Nb<sub>2</sub>O<sub>5</sub> has a higher fraction of Ni<sup>0</sup> species, which favor the hydrogen dissociation. Meanwhile, the binding energy of all Ni species (Ni<sup>0</sup>, Ni<sup>1+</sup> and Ni<sup>2+</sup>) in NiCu/Nb<sub>2</sub>O<sub>5</sub> shifted to lower binding energy, suggesting the electron transfer from Cu to Ni. The improved fraction of Ni<sup>0</sup> species afford the high activity.

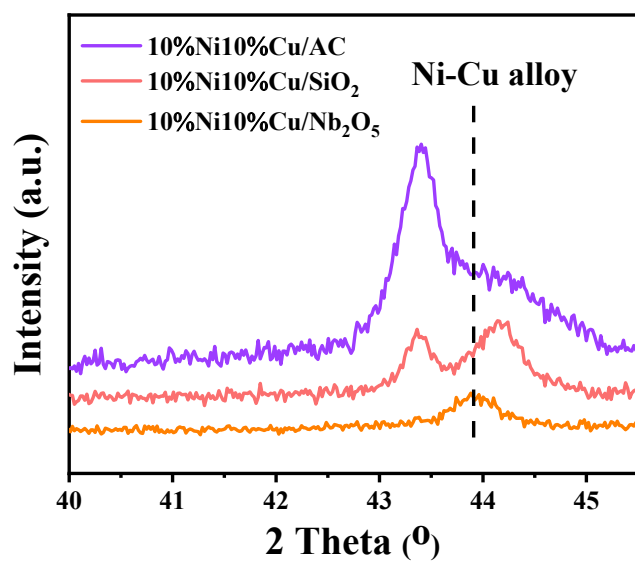

**Figure S7.** XRD patterns of 10%Ni10%Cu/AC, 10%Ni10%Cu/SiO<sub>2</sub>, 10%Ni10%Cu/Nb<sub>2</sub>O<sub>5</sub>.

**Table S3.** HDO of FA over 10%Ni10%Cu/Nb<sub>2</sub>O<sub>5</sub>, 10%Ni10%Cu/AC and 10%Ni10%Cu/SiO<sub>2</sub> catalysts after 12 hours

| Entry | Cat.                                      | Yield of octane % | Yield of heptane % | Octane/heptane ratio / O/H | Yield of oxygenated compounds <sup>(a)</sup> /% | CB. % |
|-------|-------------------------------------------|-------------------|--------------------|----------------------------|-------------------------------------------------|-------|
| 1     | 10%Ni10%Cu/Nb <sub>2</sub> O <sub>5</sub> | 86.5              | 5.1                | 16.7                       | 0.1                                             | 94.4  |
| 2     | 10%Ni10%Cu/AC                             | 34.1              | 8.3                | 4.1                        | 54.1                                            | 97.6  |
| 3     | 10%Ni10%Cu/SiO <sub>2</sub>               | 38.7              | 23.7               | 1.6                        | 25.7                                            | 98.1  |

Reaction conditions: 0.1 g catalyst, 0.2 g FA, 6.5 g cyclohexane, 4 MPa H<sub>2</sub>, 250 °C, 12 h

To further explore the uniqueness of Nb<sub>2</sub>O<sub>5</sub> support and its effects for metal sites, we prepared the Ni-Cu/SiO<sub>2</sub> and Ni-Cu/AC as comparisons. The XRD pattern (Figure S7) that there are no obvious diffraction peaks ascribed to Ni-Cu alloy on these two catalysts, indicating that SiO<sub>2</sub> and AC, unlike Nb<sub>2</sub>O<sub>5</sub>, are not able to enable the formation of Ni-Cu alloy. The experimental results and octane/heptane ratio (Table S3) confirmed that the formation of Ni-Cu alloy could effectively restrained the undesirable decarbonylation.

**References:**

1 Y. Xin, L. Dong, Y. Guo, X. Liu, Y. Hu, and Y. Wang, *J. Catal.* 2019, 375, 202-212.
